# Supplementary material
Source: bioRxiv or medRxiv preprint supplement (https://medrxiv.org/content/medrxiv/early/2021/02/04/2021.02.01.21250946/DC6/embed/media-6.pdf)
Supplement: Supplementary file [file media-6.pdf]

**Supplementary Table 1: Internal reliability of survey question measured with Cronbach's alpha.**

| <b>Survey</b> | <b>Question No.</b> | <b>alpha</b> | <b>Question text</b>                                                                                      |                                                                                    |
|---------------|---------------------|--------------|-----------------------------------------------------------------------------------------------------------|------------------------------------------------------------------------------------|
| Observer      | 1                   | 0.3799       | <i>Did the study participant read the instructions?</i>                                                   |                                                                                    |
|               | 2                   | 0.9684       | <i>Did the study participant appear confident in their ability to follow the instructions?</i>            |                                                                                    |
|               | 3                   | 0.5534       | <i>Did the study participant properly wash their hands before and after sample collection?</i>            |                                                                                    |
|               | 4                   | 0.4434       | <i>Did the study participant appear to properly follow instructions for sample collection set up?</i>     |                                                                                    |
|               | 5                   | 0.8518       | <i>Did the study participant appear to properly follow instructions for adequate sample collection?</i>   |                                                                                    |
|               | 8                   | 0.8256       | <i>Did the study participant securely fasten the collection tube?</i>                                     |                                                                                    |
|               | 9                   | 0.6961       | <i>Did the study participant clean down the outside of the sample tube following collection?</i>          |                                                                                    |
|               | 10                  | 0.8208       | <i>Did the study participant properly store their sample in the biohazard bag after collection?</i>       |                                                                                    |
|               | 11                  | 0.4703       | <i>Did the study participant appear to struggle with any particular step? If so, explain which.</i>       |                                                                                    |
|               | Participant         | 1            | 0.5617                                                                                                    | <i>Did you read all the instructions carefully prior to collecting the sample?</i> |
|               |                     | 2            | 0.7480                                                                                                    | <i>Did you feel that you needed help while collecting your sample?</i>             |
| 3             |                     | 0.5382       | <i>Do you feel confident that you collected the sample properly?</i>                                      |                                                                                    |
| 4             |                     | 0.4737       | <i>Did sample collection cause you physical discomfort?</i>                                               |                                                                                    |
| 5             |                     | 0.2517       | <i>Was collecting the sample difficult in general?</i>                                                    |                                                                                    |
| 6             |                     | 0.2229       | <i>Was it difficult to put the appropriate amount of saliva into the tube?</i>                            |                                                                                    |
| 7             |                     | 0.2251       | <i>Did you get any saliva on the outside of the collection tube?</i>                                      |                                                                                    |
| 8             |                     | 0.7217       | <i>Did you know what to do if saliva came into contact with the outside of the collection tube?</i>       |                                                                                    |
| 9             |                     | 0.9411       | <i>Did you understand that if you did not follow the procedure exactly, you might get a false result?</i> |                                                                                    |
| 10            |                     | 0.9121       | <i>Did the instructions clearly explain how to collect the sample?</i>                                    |                                                                                    |
| Laboratory    | 1                   | 0            | <i>The sample was of sufficient volume (200-500 ul)</i>                                                   |                                                                                    |
|               | 2                   | 1            | <i>The sample was easy to pipette</i>                                                                     |                                                                                    |
|               | 3                   | 1            | <i>The sample was normal, true saliva</i>                                                                 |                                                                                    |
|               | 4                   | 1            | <i>The sample was free from food particles</i>                                                            |                                                                                    |
|               | 5                   | 0.916        | <i>The sample was not unusually discolored</i>                                                            |                                                                                    |
